# Supplementary material for: Antimicrobial Silver Multilayer Coating for Prevention of Bacterial Colonization of Orthopedic Implants
Source: PubMed Central journal article supplement (PMC7143109; doi:10.3390/ma13061415), 2020-03-20
Supplement: materials-13-01415-s001.pdf [file materials-13-01415-s001.pdf]

**Supplementary Materials**

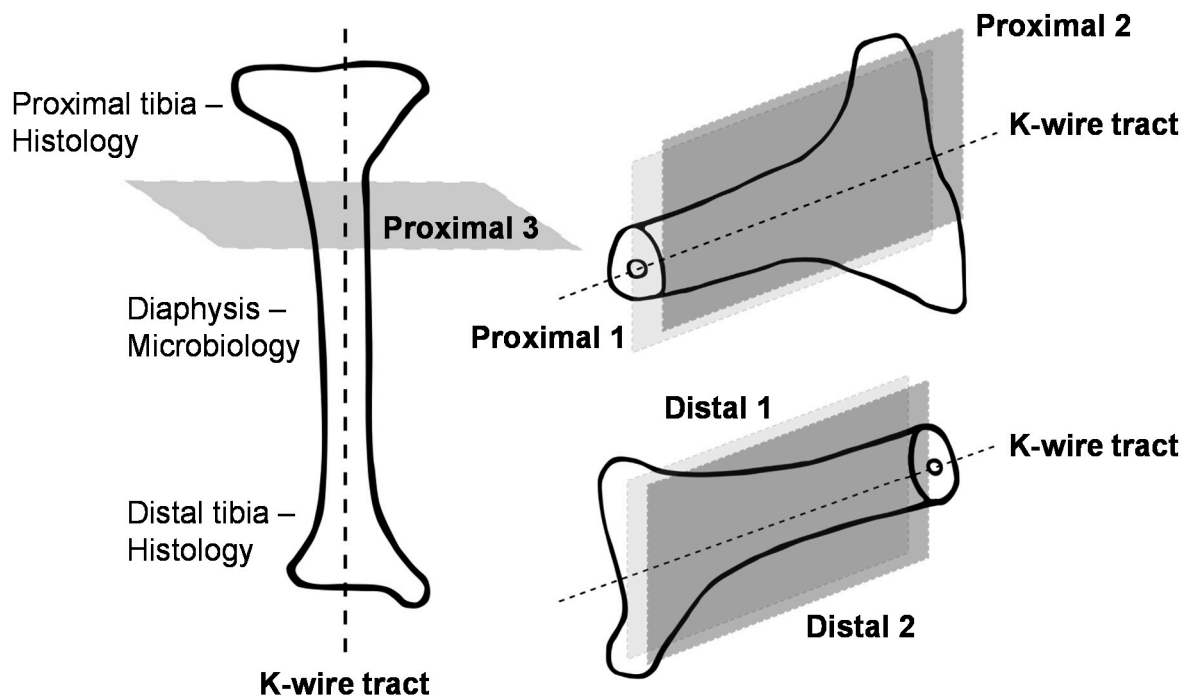

**Figure S1:** Schematics of band saw cutting of un-demineralized specimens for block preparation. From each of the 5 blocks depicted, 2 section levels spaced at least 50  $\mu\text{m}$  were cut.
